# Supplementary material for: Cellular development and evolution of the mammalian cerebellum
Source: PubMed Central journal article supplement (PMC10808058; doi:10.1038/s41586-023-06884-x), 2023-11-29
Supplement: 41586_2023_6884_MOESM1_ESM.pdf [file 41586_2023_6884_MOESM1_ESM.pdf]

**Supplementary information**

---

**Cellular development and evolution of the mammalian cerebellum**

---

In the format provided by the authors and unedited

## SUPPLEMENTARY INFORMATION

### Cellular development and evolution of the mammalian cerebellum

Mari Sepp<sup>1,15\*</sup>, Kevin Leiss<sup>1,15\*</sup>, Florent Murat<sup>1,2</sup>, Konstantin Okonechnikov<sup>3,4</sup>, Piyush Joshi<sup>3,4,5</sup>, Evgeny Leushkin<sup>1</sup>, Lisa Spänig<sup>3,4,5</sup>, Noe Mbengue<sup>1</sup>, Céline Schneider<sup>1</sup>, Julia Schmidt<sup>1</sup>, Nils Trost<sup>1</sup>, Maria Schauer<sup>6</sup>, Philipp Khaitovich<sup>7</sup>, Steven Lisgo<sup>8</sup>, Miklós Palkovits<sup>9</sup>, Peter Giere<sup>6</sup>, Lena M. Kutscher<sup>3,5</sup>, Simon Anders<sup>1,10</sup>, Margarida Cardoso-Moreira<sup>11</sup>, Ioannis Sarropoulos<sup>1,14,16\*</sup>, Stefan M. Pfister<sup>3,4,12,13,16\*</sup> & Henrik Kaessmann<sup>1,16\*</sup>

<sup>1</sup>Center for Molecular Biology of Heidelberg University (ZMBH), DKFZ-ZMBH Alliance, Heidelberg, Germany.

<sup>2</sup>INRAE, LPGP, Rennes, France.

<sup>3</sup>Hopp-Children's Cancer Center Heidelberg (KiTZ), Heidelberg, Germany.

<sup>4</sup>Division of Pediatric Neurooncology, German Cancer Research Center (DKFZ) and German Cancer Consortium (DKTK), Heidelberg, Germany.

<sup>5</sup>Developmental Origins of Pediatric Cancer Junior Group, German Cancer Research Center (DKFZ) and German Cancer Consortium (DKTK), Heidelberg, Germany.

<sup>6</sup>Museum für Naturkunde Berlin, Leibniz Institute for Evolution and Biodiversity Science, Berlin, Germany.

<sup>7</sup>NHC Key Laboratory of Diagnosis and Treatment on Brain Functional Diseases, The First Affiliated Hospital of Chongqing Medical University, Chongqing, China.

<sup>8</sup>Biosciences Institute, Newcastle University, Newcastle, UK.

<sup>9</sup>Human Brain Tissue Bank, Semmelweis University, Budapest, Hungary.

<sup>10</sup>BioQuant, Heidelberg University, Heidelberg, Germany.

<sup>11</sup>Evolutionary Developmental Biology Laboratory, Francis Crick Institute, London NW1 1AT, UK.

<sup>12</sup>Department of Pediatric Hematology and Oncology, Heidelberg University Hospital, Heidelberg, Germany.

<sup>13</sup>National Center for Tumor Diseases (NCT) Heidelberg, Germany.

<sup>14</sup>Present address: Wellcome Sanger Institute, Cambridge, UK.

<sup>15</sup>These authors contributed equally to this work.

<sup>16</sup>These authors jointly supervised this work.

\*e-mail: [m.sepp@zmbh.uni-heidelberg.de](mailto:m.sepp@zmbh.uni-heidelberg.de), [k.leiss@zmbh.uni-heidelberg.de](mailto:k.leiss@zmbh.uni-heidelberg.de), [i.sarropoulos@zmbh.uni-heidelberg.de](mailto:i.sarropoulos@zmbh.uni-heidelberg.de), [s.pfister@kitz-heidelberg.de](mailto:s.pfister@kitz-heidelberg.de), [h.kaessmann@zmbh.uni-heidelberg.de](mailto:h.kaessmann@zmbh.uni-heidelberg.de)

### 33 TABLE OF CONTENTS

|    |                                                                                        |           |
|----|----------------------------------------------------------------------------------------|-----------|
| 34 |                                                                                        |           |
| 35 | <b>METHODS</b>                                                                         | <b>3</b>  |
| 36 | Data reporting.                                                                        | 3         |
| 37 | Sample collection and ethics statement.                                                | 3         |
| 38 | Dissections.                                                                           | 4         |
| 39 | Preparation of nuclei.                                                                 | 5         |
| 40 | RNA extraction and sample quality control.                                             | 6         |
| 41 | Library preparation and sequencing.                                                    | 6         |
| 42 | Genome annotations.                                                                    | 7         |
| 43 | General data processing and quality control.                                           | 7         |
| 44 | Data integration and clustering.                                                       | 8         |
| 45 | Cell type annotation and label transfer.                                               | 9         |
| 46 | External sc/snRNA-seq datasets                                                         | 12        |
| 47 | Quantification of cell type abundances and ratios                                      | 13        |
| 48 | Bayes modelling of cell type abundance differences                                     | 15        |
| 49 | Identification of overdispersed genes.                                                 | 16        |
| 50 | Pseudoages.                                                                            | 16        |
| 51 | Stage correspondences across species.                                                  | 17        |
| 52 | Histology.                                                                             | 18        |
| 53 | Multiplexed single molecule <i>in situ</i> hybridisation data generation and analyses. | 19        |
| 54 | Immunohistochemistry.                                                                  | 20        |
| 55 | Gene expression scores.                                                                | 23        |
| 56 | Cell type lineage assignments for ventricular zone neuroblasts.                        | 24        |
| 57 | Integration of data by subsets.                                                        | 25        |
| 58 | Cross-species correlations and comparisons to the adult mouse data.                    | 25        |
| 59 | Principal components analysis.                                                         | 26        |
| 60 | Marker gene identification.                                                            | 27        |
| 61 | Pseudotemporal ordering.                                                               | 27        |
| 62 | Gene expression trajectories.                                                          | 28        |
| 63 | Presence/absence expression differences.                                               | 29        |
| 64 | Gene expression cell type-specificity.                                                 | 33        |
| 65 | Gene ontology and pathway enrichment analyses.                                         | 33        |
| 66 | Inference of transcription factor regulon activities                                   | 34        |
| 67 | Adult bulk RNA-sequencing data analyses.                                               | 35        |
| 68 | Essential and disease-associated genes.                                                | 35        |
| 69 | General statistics and plots.                                                          | 36        |
| 70 | <b>SUPPLEMENTARY REFERENCES</b>                                                        | <b>36</b> |
| 71 |                                                                                        |           |

72

## 73 METHODS

74

### 75 **Data reporting.**

76 No statistical methods were used to predetermine sample size. At least 2 biological replicates were generated  
77 for each developmental stage (except human 20 wpc). All samples are listed in Supplementary Table 1, and  
78 an overview of the samples is given in Extended Data Fig. 1a. Human sample size was based on the number  
79 of individuals available, and comparable sample size was used for mouse and opossum. The experiments were  
80 not randomized and investigators were not blinded to allocation during experiments and outcome assessment.

81

### 82 **Sample collection and ethics statement.**

83 The human prenatal samples used in this study were donated voluntarily to the MRC Wellcome Trust Human  
84 Developmental Biology Resource (HDBR; UK) by women who had an elective abortion and had given written  
85 informed consent to donate fetal tissues for research. The prenatal samples had normal karyotypes and were  
86 classified as belonging to a particular Carnegie stage or week post conception (wpc) according to their external  
87 physical appearance and measurements. The human postnatal samples are from the University of Maryland  
88 Brain and Tissue Bank of National Institutes of Health NeuroBioBank (USA), Chinese Brain Bank Center  
89 (CBBC) in Wuhan and Lenhossék Human Brain Program, Human Brain Tissue Bank at Semmelweis  
90 University (Hungary). Informed consent for the use of tissues for research was obtained in writing from donors  
91 or their family. All postnatal samples come from healthy non-affected individuals defined as normal controls  
92 by the corresponding brain bank. The use of human samples was approved by an ERC Ethics Screening panel  
93 (associated with H.K.'s ERC Consolidator Grant 615253, OntoTransEvol) and ethics committees in  
94 Heidelberg (authorization S-220/2017), North East-Newcastle & North Tyneside (REC reference  
95 18/NE/0290), London-Fulham (REC reference 18/LO/0822), Ministry of Health of Hungary  
96 (No.6008/8/2002/ETT) and Semmelweis University (No.32/1992/TUKEB).

97 RjOrl:SWISS time-mated pregnant mice (*Mus musculus*), litters at postnatal days 0-14 and adult mice were  
98 purchased from Janvier Labs (France). Bl6N mice, used only in immunohistochemistry experiments, were  
99 purchased from the Jackson Laboratory (USA) and bred at the DKFZ Central Animal Laboratory, Heidelberg.  
100 Gray short-tailed opossums (*Monodelphis domestica*) were bred in a colony in Museum für Naturkunde  
101 Berlin, Leibniz Institute for Evolution and Biodiversity Science (Germany) or Texas Biomedical Research  
102 Institute (USA; Supplementary Table 1). The animals were housed under a 12h/12h dark/light cycle (reversed  
103 for opossums) in a temperature (20-24 °C mouse; 24-26 °C opossum) and humidity (40-65% mouse, 60-65%  
104 opossum) controlled room with *ad libitum* access to food and water. Mouse and opossum stages were dated  
105 according to the time of copulation (E, embryonic day) or birth (P, postnatal day). The adult mice were  
106 sacrificed by cervical dislocation, the pups by decapitation. Opossums were sacrificed by isoflurane overdose.  
107 All animal procedures were performed in compliance with national and international ethical guidelines for the  
108 care and use of laboratory animals, and were approved by the local animal welfare authorities: Heidelberg  
109 University Interfaculty Biomedical Research Facility (T-63/16, T-64/17, T-37/18, T-23/19), DKFZ Central  
110 Animal Laboratory (DKFZ383), Vaud Cantonal Veterinary Office (No.2734.0) and Berlin State Office of  
111 Health and Social Affairs, LAGeSo (T0198/13, ZH104).

112

### 113 **Dissections.**

114 Mouse and opossum cerebella were dissected as whole or in 2 halves as described<sup>25</sup>. Mouse E10.5 and E11.5  
115 and opossum E14.5 cerebella were pooled from 2-3 littermates. (Supplementary Table 1). For human 7-11  
116 wpc samples whole cerebellar primordia were collected and divided into halves or representative fragments  
117 (ca 25% of the primordium cut perpendicular to its long axis; Supplementary Table 1). For human 17-20 wpc  
118 samples, fragments of the cerebellum were collected. Newborn, infant and toddler samples include fragments  
119 of the cerebellar cortex. Adult human samples were dissected from the posterior lobe of the cerebellar  
120 hemispheres (crus I and II), vermis (lobules VI-VIII), flocculonodular lobe and dentate nucleus using the  
121 micropunch technique<sup>56</sup>. Developmental samples were kept in ice-cold PBS during the dissection, most of the

122 meninges were removed and the samples were snap-frozen in liquid nitrogen and stored at -80 °C. If available,  
123 samples from both sexes were used for data production.

124

#### 125 **Preparation of nuclei.**

126 The nuclei were extracted as described<sup>57</sup> with modifications. Briefly, the frozen tissue was homogenized on  
127 ice in 250 mM sucrose, 25 mM KCl, 5 mM MgCl<sub>2</sub>, 10 mM Tris-HCl (pH 8), 0.1% IGEPAL, 1 μM DTT, 0.4  
128 U/μl Murine RNase Inhibitor (New England BioLabs), 0.2 U/μl SUPERase-In (Thermo Fisher Scientific),  
129 cOmplete Protease Inhibitor Cocktail (Roche) by trituration and/or using a micropestle. After 5 minutes of  
130 incubation the remaining bits of unlysed tissue were pelleted by centrifugation at 100g for 1 minute at 4°C.  
131 The cleared homogenate was centrifuged at 400g for 4 minutes to pellet the nuclei. Supernatant at this step  
132 was collected as cytoplasm extract. Nuclei were washed 1-2 times in the homogenization buffer, collected by  
133 centrifugation and resuspended in 430 mM sucrose, 70 mM KCl, 2 mM MgCl<sub>2</sub>, 10 mM Tris-HCl (pH 8), 0.4  
134 U/μl Murine RNase Inhibitor, 0.2 U/μl SUPERase-In, cOmplete Protease Inhibitor Cocktail (that optionally  
135 allowed storage of the prepared nuclei at -80°C). If needed, the nuclei were strained using 40 μm Flowmi  
136 strainers (Sigma). For estimation of nuclei concentration, Hoechst DNA dye or propidium iodide was added  
137 and nuclei were counted on Countess II FL Automated Cell Counter (Thermo Fisher Scientific). Hoechst-  
138 positive nuclei from adult human vermis, flocculonodular lobe and deep nuclei were sorted by flow cytometry  
139 to remove cellular debris present in preparations from white matter-rich brain tissues. The nuclei were sorted  
140 in PBS on BD FACSAria III using BD FACSDiva 8.0.1 software (BD Biosciences). Gates were set on  
141 FSC/SSC and at the excitation wavelength of 405 nm (Extended Data Fig. 1b). The obtained suspension  
142 contained 68-86% Hoechst-positive particles, as determined on Countess FL Automated Cell Counter. A few  
143 modifications in the nuclei preparation method were applied in the pilot phase of data production: (1) the  
144 tissue was lysed in HEPES-based homogenisation buffer (250 mM sucrose, 25 mM KCl, 5 mM MgCl<sub>2</sub>, 10  
145 mM HEPES (pH 8), 0.1% IGEPAL, 1 μM DTT, 0.4 U/μl Murine RNase Inhibitor, 0.2 U/μl SUPERase-In),  
146 the nuclei were fixed with DSP (dithio-bis[succinimidyl propionate]) as described<sup>58</sup> and then processed as

147 above; (2) the tissue was lysed in Triton X-100 homogenisation buffer (320 mM sucrose, 5 mM CaCl<sub>2</sub>, 3 mM  
148 Mg-acetate, 10 mM Tris-HCl (pH 8), 0.1 % Triton X-100, 2 mM EDTA, 0.5 mM EGTA, 1 mM DTT, 0.4  
149 U/μl Murine RNase Inhibitor, 0.2 U/μl SUPERase-In). The two mouse datasets produced with the modified  
150 protocols were comparable to the ones produced with the standard protocol in terms of cellular composition  
151 and gene expression (Extended Data Fig. 1d) and were therefore included in the merged datasets.  
152 Supplementary Table 1 lists nuclei preparation details for each sample.

153

#### 154 **RNA extraction and sample quality control.**

155 Cytoplasm extracts or nuclei suspensions were mixed with 40 mM DTT-supplemented RLT buffer (Qiagen)  
156 and 100% ethanol at 2:7:5 ratio. The mixtures were subjected to RNA purification with RNeasy Micro Kit  
157 (Qiagen). RNA quality numbers (RQN), determined on Fragment Analyzer (Advanced Analytical), were  
158 above 7 for all samples except some of the human infant and toddler samples, and opossum P42 and adult  
159 samples (Supplementary Table 1).

160

#### 161 **Library preparation and sequencing.**

162 Chromium Single Cell 3' Reagent kits (v2 or v3 chemistry) and the Chromium Controller instrument (10x  
163 Genomics) were used for single cell barcoding and library construction according to manufacturer's protocols.  
164 In most of the experiments 15,000 nuclei were loaded per channel (range 13,000-17,000). cDNA was  
165 amplified in 12 PCR cycles. Libraries were quantified on Qubit Fluorometer (Thermo Fisher Scientific) and  
166 the average fragment size was determined on Fragment Analyzer. Libraries were sequenced on Illumina  
167 NextSeq 550 (26/28 cycles for Read 1, 8 cycles for i7 index, 57/56 cycles for Read 2 in case of v2/v3 libraries)  
168 or HiSeq 4000 (26/28 cycles for Read 1, 8 cycles for i7 index, 56-74/74 cycles for Read 2 in case of v2/v3  
169 libraries).

170

171 **Genome annotations.**

172 For human and mouse we used gene annotations from Ensembl release 91<sup>59</sup>, based on reference genome  
173 assemblies hg38 (human) and mm10 (mouse). For opossum, we used monDom5-based annotations from  
174 Ensembl release 87 extended using stranded poly(A) RNA-seq datasets<sup>19</sup> from the adult brain as described<sup>60</sup>.  
175 We split each of the opossum chromosomes 1 and 2 at the nucleotide position 536,141,000, which does not  
176 overlap any gene, given that the large size of these chromosomes is not compatible with many bioinformatics  
177 pipelines. We generated custom genome reference files with *cellranger mkref* pipeline from Cell Ranger (10x  
178 Genomics). Since snRNA-seq captures both mature mRNA and unspliced pre-mRNA, we additionally created  
179 pre-mRNA references by merging exons and introns of each gene. Orthology relationships were extracted  
180 from Ensembl release 91. The list of mouse transcription factors was downloaded from the animal TFDB  
181 (v.3.0)<sup>61</sup>.

182

183 **General data processing and quality control.**

184 Raw sequencing data were demultiplexed using *cellranger mkfastq* pipeline (Cell Ranger versions 2 or 3.0.2,  
185 10x Genomics, internally calling *bcl2fastq*). Read alignment and counting of Unique Molecular Identifiers  
186 (UMIs) was performed with *cellranger count*. Reads from each library were aligned and counted in two  
187 modes: (1) using the mature mRNA reference (exons) or (2) the pre-mRNA reference (exons and introns). We  
188 used the pre-mRNA counts (exons and introns) in most of the analyses to maximise the amount of reads for  
189 quantification. We used the mature mRNA counts (exons) in specific cases: library-level quality control  
190 (Extended Data Fig. 1d) and presence/absence expression differences (Fig. 4e-i, Extended Data Fig. 11-12).  
191 Valid barcodes (i.e. droplets containing a nucleus) were identified by leveraging the higher abundance of  
192 intronic reads (originating from pre-mRNAs) in nucleus-containing droplets compared to empty droplets that  
193 mostly contain background levels of cytoplasmic mature mRNAs. For each barcode the fraction of intronic  
194 UMI counts was estimated as  $[1 - (\text{exonic counts} / \text{pre-mRNA counts})]$ . Barcodes were clustered by their fraction  
195 of intronic UMIs using a Gaussian mixed model (*mclust*<sup>62</sup> package v5.4.3, R) with two expected clusters. The



216 barcodes in the cluster with higher mean fraction of intronic reads were considered as valid. Duplicates were  
217 removed using Scrublet<sup>63</sup> (v0.2, python v3.6.8) by calculating the ‘doublet score’ for each barcode and  
218 removing barcodes with a ‘doublet score’ higher than the 90% quantile. One human sample (SN296) was  
219 removed during the cell type annotation procedure due to high contamination from neighbouring brain regions  
220 (see below). Altogether, 115,282 mouse, 180,956 human and 99,498 opossum cells, with a median of 2,392  
221 UMIs per cell, passed the filtering steps (Extended Data Fig. 1a,e).

222 To assess the quality of the sequenced libraries, we aggregated expression values (mature mRNA counts)  
223 across all cells within each batch into pseudobulks and calculated Spearman’s rho correlation coefficients  
224 between the pseudobulks using genes expressed in at least 10% of the cells in at least one biological replicate  
225 (human n = 7,696; mouse n = 4,806; opossum n = 2,765). We observed high correlations between the libraries  
226 from the same developmental stage, even when different Chromium reagents (v2 and v3) were used to produce  
227 the libraries (Extended Data Fig. 1d).

228

### 229 **Data integration and clustering.**

230 We used LIGER (0.4.2, R)<sup>14</sup> to perform batch correction and integrate data across stages within each species.  
231 Libraries across all developmental stages and individuals were considered as individual batches.  
232 Normalization and selection of highly variable genes were performed using LIGER with default parameters,  
233 followed by integrative non-negative matrix factorization (*optimizeALS* function) with k=100. The obtained  
234 embeddings were then used as the basis for UMAP visualisation (uwot 0.1.10, R)<sup>64</sup>. To annotate cell types,  
235 we applied iterative unsupervised clustering within each species using the SCANPY (v1.5.1) implementation  
236 of the Louvain algorithm with a resolution of 3. First, we clustered the entire datasets for each species. For  
237 each identified cluster we split the data by batch and repeated the LIGER integration (k=50) and Louvain  
238 clustering as described above to divide the data into subclusters. Batches with low cell contribution (<50 cells)  
239 to a cluster were excluded from sub-clustering. This iterative procedure yielded 68 (human), 61 (mouse) and

220 67 (opossum) clusters split into 574-611 subclusters for each species (Supplementary Tables 2-4, Extended  
221 Data Figure 2b).

222 We integrated the snRNA-seq data across species and across developmental stages in a common embedding  
223 (in pairs or all three species combined) using LIGER as described above. We used 1:1 orthologous genes  
224 detectable (i.e. at least 1 UMI) in all batches and variable across cells (n=6,101 for mouse/human; n=5,019  
225 for mouse/opossum; n=3,742 for global). The initial integration resulted in manifolds where species-specific  
226 differences were still visible. To further merge the embeddings across species, MNN-correct<sup>65</sup> (*fastMNN*, R,  
227 *batchelor package 1.0.1*) was applied with species assignment as the integration vector. This generated 100-  
228 dimensional aligned embeddings that were used for transfer of cell type labels (pairwise embeddings) or  
229 estimation of pseudoages (global embedding) as described below. For visualisation purposes, we used the  
230 aligned embeddings to compute 2D and 3D UMAP coordinates for the cross-species integrated datasets (uwot  
231 0.1.10, R<sup>64</sup>, Extended Data Fig. 2b,d; <https://apps.kaessmannlab.org/sc-cerebellum-transcriptome>).

232

### 233 **Cell type annotation and label transfer.**

234 Given that the development of cerebellar cell types and their marker genes have been mostly described in  
235 mouse<sup>6,12,7,66</sup>, we first annotated the cells in the merged mouse dataset. Besides literature-based marker genes,  
236 we extensively used the *in situ* hybridisation data from the Allen Developing Mouse Brain Atlas<sup>15</sup> and  
237 GenePaint<sup>67,68</sup>. We assigned each subcluster to a broad lineage (e.g. VZ for neurons born at ventricular zone),  
238 cell type (e.g., *Purkinje*) and cell state (e.g., *Purkinje\_defined*). Cell states that displayed remaining variability  
239 were further split into subtypes (e.g., *Purkinje\_defined\_FOXPI*; Extended Data Fig. 2a-c). The cells that were  
240 not included in any subcluster were annotated only in case their identity could be unequivocally determined  
241 (Supplementary Table 2). The smallest clusters (<100 cells) were annotated as whole clusters. Although we  
242 mostly use the term “type” to group cells committed to a distinct mature cell fate and “state” to refer to  
243 differentiation status that often form a continuum within each cell type category (Extended Data Fig. 2a,c),  
244 there are a few notable exceptions: (1) splitting early neuroblasts based on their final fate was often not

245 possible and we therefore included separate “cell type” level categories (e.g., *VZ\_neuroblast*) to label these  
246 nascent postmitotic neurons; (2) the “cell type” level category *GC/UBC* was used to annotate subclusters that  
247 displayed co-expression of granule and unipolar brush cell markers; (3) we split neural progenitors into  
248 spatiotemporal “subtypes”, although some of these might alternatively be considered as sub-states of the same  
249 progenitor subtype (e.g., *progenitor\_RL\_early* and *progenitor\_RL*); (4) in case of the  
250 *oligodendrocyte\_progenitor* cell state the sub-states (*pre-OPC*, *OPC* and *COP*) were distinguished at the level  
251 of “subtype” categories; (5) we grouped all immune cells into a single “cell type” category, because of low  
252 numbers of these cells in our datasets. The terms used to designate cell state categories include descriptors  
253 “progenitor” (proliferating cells), “neuroblast” (nascent postmitotic neurons), “glioblast” (glial cells exiting  
254 cell cycle), “differentiating”, “defined”, and “maturing” ordered from less differentiated to more mature cell  
255 states, but not formally aligned across different cell type lineages (Extended Data Fig. 2a,c). In sum, 97% of  
256 the cells in the mouse dataset were specified at the level of cell state, out of which 51% were additionally  
257 assigned to a subtype (Supplementary Table 2). 1.0% of cells were annotated only at the level of cell type,  
258 these included low-quality granule cells and unresolved subclusters that contain cells from different cell types  
259 located at the nuclear transitory zone (*NTZ\_mixed*).

260 Next, we used the pairwise cross-species aligned embeddings to transfer the annotation labels from the mouse  
261 subclusters to the subclusters in the human and opossum datasets (Extended Data Figure 2b). We determined  
262 centroids of all species-specific subclusters in the aligned embeddings, calculated centroid Pearson  
263 correlations and transferred the label of the highest correlating mouse subcluster to each human and opossum  
264 subcluster. We curated the transferred labels by inspecting the expression of marker genes in each subcluster  
265 in the human and opossum datasets (Supplementary Tables 3-4). In the human dataset we noticed two clusters  
266 (23 and 34) that mostly contained cells from one batch (SN296) and where expression of *HOX* genes was  
267 detectable, indicating that these clusters contained contaminating brainstem cells. We removed this batch from  
268 the human dataset and did not annotate the remaining cells (n=113) in the two clusters. Out of the transferred  
269 subcluster labels, 69/61% (human/opossum) were confirmed, 4.2/9.9% were re-annotated because of sampling

270 differences (e.g., midbrain-derived *MB\_neuroblast* detected in the opossum dataset only), 23/19% of the labels  
271 were adapted at the level of subtypes or related cell states, 1.7/4.7% of the labels were changed at the level of  
272 cell type, and 2.8/4.8% of the labels were removed because of unclear identity of the cells in these subclusters  
273 (mixed populations of cells, likely doublets and/or low quality cells). The human and opossum subclusters  
274 that did not receive a transferred label, were annotated *de novo* as described for the mouse dataset. As a result  
275 of the label transfer and curation procedures 97% and 94% of the cells in the human (not considering the  
276 removed brainstem library) and opossum datasets were specified at the level of cell state, out of which 47%  
277 and 40%, respectively, were additionally assigned to a subtype (Supplementary Table 3-4). 1.1% of human  
278 cells and 2.6% of opossum cells belonged to subclusters that contain cells from different cell types located at  
279 the nuclear transitory zone (*NTZ\_mixed*). 0.6% of human cells belonged to subclusters that contain  
280 glutamatergic neurons with uncertain identity originating from adult deep nuclei-enriched samples, and  
281 expressing markers of deep nuclei neurons (*NDUFA4*, *FAU*, *ATP5E*) and granule cells (*PAX6*, *SLC17A7*;  
282 *glutamatergic\_uncertain*). The unlabelled cells (2.5% of mouse, 1.2% of human and 3.7% of opossum cells)  
283 were included in the merged datasets, but excluded from downstream analyses of cerebellar cell type  
284 transcriptomes.

285 Some annotation categories were not detected in all three species (Extended Data Fig. 2c). Out of these, many  
286 involve contaminating cell types located at the dissection borders: *progenitor\_RP* (roof plate), *motorneuron*,  
287 and *neural\_crest\_progenitor* groups detected only in mouse, *progenitor\_MB* and *MB\_neuroblast* (midbrain)  
288 detected in opossum, *isthmic\_neuroblast* detected in human and opossum, and *GABA\_MB* (midbrain) detected  
289 in human. Some categories were not detected in human likely due to their overall low numbers:  
290 *isth\_N\_SLC5A7* is the least abundant subtype among the isthmic nuclei neurons in the mouse and opossum  
291 datasets (less than 250 cells) and these cells are situated at the dissection border; ependymal cells have low  
292 abundance in the mouse (57 cells) and opossum (160 cells) datasets, and are likely present in the human  
293 subcluster “orig.cl\_38\_9” (Supplementary Table 3) that, however, also contains cells from other types and  
294 was therefore not assigned to a cell type; *MBO* (midbrain-originating cells) were not distinguished in the

295 human dataset, but markers of this cell type were expressed among some of the cells annotated as *NTZ\_mixed*  
296 (“orig.cl\_16\_1”, Supplementary Table 3). Sampling of tissue fragments in human could be the reason why we  
297 did not distinguish *GC\_diff\_2\_OTX2* in this species. The lower resolution of Purkinje subtype mapping in  
298 human could be related to the differences in Purkinje cell sampling, developmental dynamics, and/or subtype  
299 prevalence. In the mouse dataset, we did not distinguish subtype *progenitor\_VZ\_anterior*, likely due to limited  
300 resolution, given that it was possible to identify this subpopulation based on snATAC-seq data<sup>25</sup>. We also did  
301 not detect *preOPCs* in the mouse dataset: this population was mostly sampled from a single stage in human  
302 (17 wpc) and opossum (P14), and is in general expected to be scarce in the cerebellum given that more than  
303 90% of oligodendrocytes in the mouse cerebellum originate in the ventral hindbrain<sup>69</sup>. The presence of group  
304 *glutamatergic\_uncertain* in the human dataset only is due to inclusion of data from adult samples  
305 microdissected from deep nuclei region. Similarly, inclusion of these samples could underlie the unique  
306 detection of oligodendrocyte progenitors subtypes *OPC\_early* and *OPC\_late* only in the human dataset.  
307 Nevertheless, separation of human OPCs into subtypes is supported by previous studies<sup>70</sup>. It remains unclear  
308 if the human-unique categories *glut\_DN\_maturing*, *GC\_diff\_1\_early* and *GC\_diff\_1\_late*, and the opossum-  
309 unique categories *interneuron\_MEIS2* and *ependymal\_progenitor* are a result of biological or technical  
310 variation.

311

### 312 **External sc/snRNA-seq datasets**

313 Processed data and annotations of adult mouse cerebellum snRNA-seq dataset by Kozareva *et al.*<sup>7</sup> were  
314 downloaded from [https://singlecell.broadinstitute.org/single\\_cell/study/SCP795](https://singlecell.broadinstitute.org/single_cell/study/SCP795). Processed data and  
315 annotations of human fetal cerebellum sn/scRNA-seq dataset by Aldinger *et al.*<sup>13</sup> were downloaded from  
316 <https://www.covid19cellatlas.org/aldinger20/>. Cell type annotations of mouse developing cerebellum  
317 scRNA-seq dataset by Smith *et al.*<sup>21</sup> were downloaded from  
318 <https://www.ncbi.nlm.nih.gov/geo/query/acc.cgi?acc=GSE209915>. Cell type annotations of mouse  
319 developing cerebellum scRNA-seq datasets by Carter *et al.*<sup>10</sup> and by Vladoiu *et al.*<sup>11</sup> were provided by the

320 authors through personal communication. Processed data of human embryonic and fetal (6.6, 6.7, 6.9, 8, 8.1,  
321 8.5 11.5, 12, and 14 wpc) cerebellum scRNA-seq data by Braun *et al.*<sup>22</sup> were downloaded from  
322 <https://github.com/linnarsson-lab/developing-human-brain>. We used Seurat<sup>71</sup> v4.0.6 to transfer the cell type  
323 annotations from our human dataset to the Braun *et al.*<sup>22</sup> cerebellum data. For each dataset, gene expression  
324 counts were scaled to 10,000 and log-normalised. After identifying the 5000 most highly variable genes for  
325 each dataset, we used their intersection (2694 genes) to identify anchors between the datasets with the function  
326 FindTransferAnchors(). Annotations were then transferred from our dataset (reference) to Braun *et al.*<sup>22</sup>  
327 (query) with the function TransferData() with k.weight = 30 and weight.reduction = "cca".  
328 From the Aldinger *et al.* dataset, we extracted barcodes annotated as Purkinje cells (n=25 711), and used  
329 LIGER<sup>14</sup> (k=10) to perform batch correction and integrate data across stages, assigning batches by *sample\_id*  
330 and *experiment*. We performed Leiden clustering (leidenAlg<sup>72</sup>, version 1.0.5; resolution 0.6), and identified  
331 clusters that contained barcodes that likely represent doublets or contaminated nuclei, based on the higher  
332 number of counts in these clusters and co-expression of markers of several cell types (*PAX2* for interneurons,  
333 *PAX6* for granule cells, *SOX2* for astroglia lineage cells). After excluding the contaminated clusters, we  
334 performed LIGER integration (k=10) and Leiden clustering (resolution 1.2) on the remaining barcodes  
335 (n=14,246, 55% of the barcodes annotated as Purkinje cells in the original dataset). We annotated 15 of the  
336 obtained 17 clusters based on the expression of Purkinje subtype markers *RORB*, *FOXP1*, *CDH9*, *ETV1*, *EBF1*  
337 and *EBF2*. 732 barcodes (2 clusters, 5.1% of the barcodes) were not assigned to a subtype.

338

### 339 **Quantification of cell type abundances and ratios**

340 To quantify the relative abundances of cell types at each developmental stage in mouse, human and opossum,  
341 we grouped cells by cell type and required at least 50 cells per group (this resulted in the removal of 0-280  
342 cells per developmental stage). For Fig. 1e, we quantified the cell type proportions across the whole datasets.  
343 The human adult deep nuclei libraries were excluded from Fig. 1e, since we did not sample deep nuclei  
344 separately in the two other species. The cell type proportions in individual adult human samples from different

345 cerebellar cortical regions and deep nuclei are shown in Extended Data Fig. 7c. For Fig. 1f, we quantified the  
346 cell type proportions in each biological replicate separately (human 8 wpc libraries from the same individual  
347 produced with the same Chromium version were merged; human adult deep nuclei libraries were excluded),  
348 and determined the median between the biological replicates. In Fig. 1f, we did not consider cells that were  
349 not assigned to a cell type or belong to cell types/subtypes, which are from brain regions adjacent to the  
350 cerebellum: *GABA\_MB*, *progenitor\_MB*, *progenitor\_isthmic*, *motor\_neuron*, *neural\_crest\_progenitor*,  
351 *isthmic\_neuroblast*, *MB\_neuroblast*.

352 For Extended Data Fig. 7f, we estimated the proportions of Purkinje cells using the cell type annotations  
353 provided by the original studies, if available. For Carter *et al.* mouse dataset, we additionally included cells  
354 originally annotated as *GABA Progenitor* among the Purkinje cell counts, as they express markers of  
355 differentiating Purkinje cells (*Lhx5*, *Foxp2*)<sup>10</sup>. For Vladoiu *et al.* mouse dataset, we additionally included cells  
356 originally annotated as *Brainstem progenitors* among the Purkinje cell counts, as our previous analyses  
357 indicated that these represent differentiating Purkinje cells<sup>25</sup>. For Braun *et al.* human dataset, cells with a  
358 transferred label *Purkinje* were included among the Purkinje cell counts.

359 For Fig. 2e, we calculated the ratio of cell numbers of the early-born Purkinje subtypes (FOXP1, RORB) and  
360 the late-born subtypes (CDH9, ETV1) in each biological replicate. We only included samples that met the  
361 following criteria: (i) they come from fetal stages when Purkinje cell generation is complete (9-20 wpc in  
362 human), (ii) the relative abundances of *Purkinje\_maturing* state cells (which were not separated into subtypes)  
363 among the *Purkinje\_defined* and *Purkinje\_maturing* cells is below 5% (our dataset; Extended Data Fig. 3i),  
364 (iii) at least 50 subtype-assigned cells are present. In the case of the Aldinger *et al.*<sup>13</sup> dataset we excluded  
365 samples that only contained the hemisphere or vermis (n=2), which altogether resulted in the inclusion of 9  
366 samples representing 8 fetal stages (2 replicates for 14 wpc, and 1 replicate for each other stage). For subtype  
367 relative abundances presented in Extended Data Fig. 3i,r, 4j and 5h, we required at least 50 cells of the  
368 respective cell states to be present in a sample.

369



### 370 **Bayes modelling of cell type abundance differences**

371 To test for differences in cell type abundances (Extended Data Fig. 7d), we applied a Bayesian hierarchical  
372 model that accounts for species-specific, biological and technical variability. For each species, stage and cell  
373 type the relative abundances were modelled using a binomial model. The true proportion of a given cell type  
374 within each species and stage was treated as an unobserved variable, which we modelled as a normal  
375 distribution to simulate the expected distribution of biological relative abundances of the given cell type. The  
376 mean of this normal distribution is drawn from a species and stage specific Student's T distribution with  
377 uninformative priors. The standard deviation is drawn from a wide exponential distribution with  $\lambda = 1$ . These  
378 settings set a broad prior to the model. Specifically, we modelled the number of cells of a certain cell type  $i$  as  
379 follows:

$$\begin{aligned} y_i &\sim \text{Binomial}(N, \alpha_i) \\ \alpha_i &\sim \text{Normal}(\alpha_{0i}, \sigma_i), 0 \leq \alpha_{0i} < 1 \\ \alpha_{0i} &\sim \text{StudentT}(1, 1.5, 1) \\ \sigma_i &\sim \exp(1), \sigma_i > 0 \end{aligned}$$

381

382 where  $N$  is the total cell count and  $y_i$  represents the relative abundances of an investigated cell type within a  
383 distinct biological replicate. The hyperparameter  $\alpha_i$  estimates the species-specific proportion of a certain cell  
384 type.  $\alpha_i$  is sampled from a species and stage specific normal distribution. Only biological replicates with more  
385 than 50 cells of the target cell type were subjected to the fitting. The model was fitted using RStan<sup>73</sup> (v2.19.3,  
386 R, *sampling* function; *iter*=4,000, *control*=list(*adapt\_delta*=0.99)). We then computed the pairwise  
387 differences of  $\alpha_0$  between the species, using the simulated posterior distributions. We evaluated the 95%  
388 highest density interval (HDI<sup>74</sup>, *HDInterval*, v0.2.2, R) of the results and tested for differences using the  
389 Region Of Plausible Equality (ROPE) method. If the HDI of at least two comparisons (pairwise between the  
390 three species) did not overlap 0, we assumed a difference in cell type proportion.

391 Of note, although independently developed, our approach is similar to the method recently established by  
392 Phipson et al. 2022<sup>75</sup> (propeller) that performed well in an independent comparison of statistical methods for  
393 cell type composition analysis<sup>76</sup>. Bayesian framework was also implemented by Büttner et al. 2021<sup>77</sup>



394 (scCODA) and shown to improve the performance compared to other methods, particularly when only a few  
395 biological replicates are available. We opted not to use scCODA<sup>77</sup>, since it requires selection of a reference  
396 cell type.

397

### 398 **Identification of overdispersed genes.**

399 To stratify for informative genes, we identified highly variable genes based on an overdispersion cutoff. This  
400 approach was used for the estimation of correspondences between developmental stages across species (see  
401 *Stage correspondences across species*), comparing cell states and subtypes between datasets (see *Cross-*  
402 *species correlations and comparisons to the adult mouse data*), and identification of genes that are dynamic  
403 during neuronal differentiation (see *Gene expression trajectories*). Gene expression was normalized by  
404 dividing the number of UMIs by the sum of UMIs per cell (size factor). Next, we calculated the mean  
405 expression and variance using the normalized values to compute the gene-wise variance to mean ratio (*VMR*).  
406 Assuming Poisson distribution of non-informative genes, we estimated the expected variance to mean  
407 relationship (*pVMR*) by averaging over the inverse size factor. We expected genes that are highly variable to  
408 exhibit:

$$409 \quad \quad \quad VMR > \alpha pVMR$$

410 We set  $\alpha$ , if not stated otherwise, to 1.5.

411

### 412 **Pseudoages.**

413 The 100-dimensional cross-species integrated global embedding of human, mouse and opossum datasets was  
414 used to determine a quasi-aligned continuous developmental vector, called pseudoage<sup>18</sup>. First, each mouse cell  
415 was assigned with a simple index of development, depending on its developmental stage, i.e. the first sampled  
416 stage (E10.5) was assigned with 1, the second (E11.5) with two. Next, this dataset was subsampled for each  
417 mouse time point to either 1,000 cells or the maximum number of cells per cell type, whichever value was  
418 smaller, to reduce the effect of cell type abundance differences between the stages. The resulting matrix was  
419 used as the reference. Next, for each cell in the human, mouse and opossum datasets, the 25 nearest reference

420 cells (mouse) were identified and the mean of their developmental index was assigned to each query cell as  
421 its pseudoage.

422

### 423 **Stage correspondences across species.**

424 To establish correspondences between the developmental stages sampled in mouse, human and opossum, we  
425 applied three different metrics: (I) transcriptome similarity, (II) pseudoage similarity, and (III) cell state  
426 abundance agreement.

427 (I) Transcriptome similarity. We identified the pairwise shared informative 1:1 orthologous genes in the  
428 human, mouse and opossum datasets (intersect of overdispersed genes, human vs. mouse  $n = 336$ , opossum  
429 vs. mouse  $n = 369$  genes). We generated pseudobulks for each developmental stage by summing the UMI  
430 counts per gene from all cells. For each species, we normalized the expression values to CPM and mean-  
431 centered each gene's expression values. Next, we subsetting the normalized data for the pairwise shared  
432 informative genes, to calculate the Spearman correlation coefficients between the developmental stage  
433 pseudobulks from all species, and computed the correlation distances by taking the arccosine of the distance.

434 (II) Pseudoage similarity. We globally binned the cells from all species based on their pseudoages into 50  
435 equally-sized bins. We then inferred for each developmental stage the proportions of cells in different  
436 pseudoage bins and used these proportions to calculate Manhattan distances for all cross-species  
437 developmental stage pairs.

438 (III) Similarity of cell state proportions. For each cross-species pair of developmental stages, we computed  
439 the proportion of cells that had the same cell state annotation, and used these proportions to determine the  
440 pairwise Manhattan distances.

441 We used the dynamic time warping algorithm ( $dtw^{78}$ ,  $dtw$  v1.20, R) to find the lowest distance path through  
442 the 2D developmental plane in the distance matrices from all three approaches. We used mouse as a focal  
443 species for assigning correspondences. The three metrics showed good overall agreement (Extended Data Fig.  
444 2e-g). When a developmental stage in human or opossum aligned with two or more stages in mouse, we kept

445 the one with the smallest transcriptome correlation distance (Extended Data Fig. 2e-g). We grouped human  
446 samples from Carnegie stages 18 and 19 (7 wpc) as both show low transcriptome correlation distance to E11.5  
447 in mouse. The toddler stage in human and P60 stage in opossum best matched P14 and/or P63 stages in mouse,  
448 but were kept as a separate intermediate stage between P14 and P63 in mouse, given that mouse P14 was  
449 assigned to the infant stage in human and P42 in opossum, and mouse P63 was assigned to the adult stage in  
450 both human and opossum. We note that the estimated stage correspondences are dependent on the sampling  
451 scheme and, although they overall agree with previous studies<sup>19</sup>, should not be interpreted as absolute best  
452 matches.

453

#### 454 **Histology.**

455 For cryosections, whole heads (E14.5, P1, P4, P5, P21) or dissected cerebella (P42) of opossums were  
456 mounted in Tissue-Tek OCT compound (Sakura Finetek) and frozen in isopentane cooled to its freezing point.  
457 12 µm sagittal cryosections were collected on SuperFrost Plus slides (Thermo Scientific), fixed in 4% PFA in  
458 PBS for 12 minutes, washed 3 times with PBS and incubated in 70% ethanol at 4°C overnight. The sections  
459 were rehydrated and permeabilized in 0.2% Triton X-100 in PBS for 20 minutes and stained with DAPI and  
460 NeuroTrace 530/615 red fluorescent Nissl (both 1:300 in PBS) from the BrainStain imaging kit (Thermo  
461 Fisher Scientific) for 20 minutes at room temperature. After washing with 0.2% Triton X-100 in PBS for 3x10  
462 minutes, the sections were mounted in Prolong Diamond Antifade Mountant (Thermo Fisher Scientific).  
463 Stitched Z-stack fluorescence images were acquired on Olympus CellSens widefield microscope equipped  
464 with 10x 0.4 NA and 20x 0.75 NA objectives, and motorized XY-stage and Z-drive. Extended Focus Imaging  
465 projection was calculated using the cellSens software.

466 For FFPE sections, whole heads of P4 and P14 opossums were fixed in 4% formalin and transferred to 70%  
467 ethanol for storage. After decalcification with EDTA (25% v/v), the specimens were embedded in paraffin  
468 and sectioned at 6 µm using a sliding microtome (Leica SM2010 R). Sections were stained with Heidenhain's  
469 AZAN. Microphotography was done with a LEICA camera (DFC490) mounted on a ZEISS Axioskop

470 equipped with 1.25X and 2.5X objectives, employing the standard LEICA Application Suite (LAS X) for  
471 image capturing.

472 The mouse histology images are from the Allen Developing Mouse Brain Atlas<sup>15</sup>. Human images are from the  
473 HDBR Atlas<sup>79–81</sup>.

474

#### 475 **Multiplexed single molecule *in situ* hybridisation data generation and analyses.**

476 The spatial mapping was performed using an available 12-week post-conception human cerebellum sample  
477 provided by the Human Developmental Biology Resource (HDBR; UK). The cerebellum was dissected,  
478 mounted in Tissue-Tek OCT compound (Sakura Finetek) and frozen in isopentane cooled to its freezing point.  
479 10 µm coronal cryosections were collected on Molecular Cartography coverlips (Resolve Biosciences). The  
480 probeset targeted 100 genes (Supplementary Table 6) manually selected based on our snRNA-seq data to  
481 cover markers of the cerebellar cell (sub)types and states, and selected genes with presence/absence expression  
482 differences between human and mouse (see *Presence/absence expression differences*). Among the latter we  
483 selected genes that are expressed in the human respective cell type in the 11-17 wpc developmental time  
484 window based on snRNA-seq data, and for which absence in the mouse respective cell type is supported by  
485 public *in situ* hybridisation data<sup>15,16</sup> (Supplementary Table 6). Molecular Cartography probe sets were  
486 designed and the data was produced as a service at Resolve Biosciences, Monnheim. smFISH data was  
487 visualised in Fiji using the PolyLux plugin (V1.9.0., Resolve Biosciences).

488 We performed cell segmentation based on the detected transcripts considering joint likelihood of  
489 transcriptional composition and cell morphology using the Baysor<sup>82</sup> (v0.5.2) Julia (v1.6.4) library. The  
490 following parameters were set for each sample: “min-molecules-per-gene=1”, “min-molecules-per-cell=3”,  
491 “scale=25.0”, “scale-std=’25%””, “estimate-scale-from-centers=true”, “min-molecules-per-segment=2”. The  
492 sampling step of Baysor was run with “new-component-weight=0.2” and “new-component-fraction=0.3”.  
493 Importantly, only segments that passed the 0.95 confidence level, as assigned by Baysor, were considered as  
494 cells. A custom R script was used to convert the Baysor output into a classical scRNA-seq raw dataset. The

495 resulting data was integrated with the 11 wpc human snRNA-seq data (excluding cells from categories  
496 *GABA\_MB* and *NTZ\_mixed*) using the Python (v3.9) library of Tangram<sup>83</sup> (v1.0.3). For imputation of  
497 metadata, Tangram function “project\_cell\_annotation” was applied with default parameters. We imputed  
498 metadata separately at two levels: cell type and precisest label, which combines cell states and subtype  
499 information. Each segmented cell was assigned to the highest-scoring metadata category.

500 For the presentation of imputed cell type labels in Fig. 1d and Extended Data Fig. 12f, we required at least 15  
501 transcripts and an area of >500 pixels (9.522  $\mu\text{m}^2$ ) per segment, and filtered out outliers that had the transcript  
502 numbers or area larger than the sum of the 3rd quantile and 1.5 times the interquartile range ( $n_{\text{transcripts}} >$   
503  $\sim 140$ ;  $\text{area} > \sim 7040$  pixels (134  $\mu\text{m}^2$ )). As a result we kept 87,140 (73%) of the initial 119,059 Baysor-  
504 estimated segments. The median metadata prediction score (Tangram) of the selected segments was 0.072 in  
505 case of cell type imputation and 0.050 in case of precisest label imputation. The prediction scores varied per  
506 group, for instance among the more abundant cell types (>1000 segments) the median score was the highest  
507 for the predicted Purkinje cell segments (0.084) and the lowest for GC/UBC segments (0.042). Similarly,  
508 among the precisest labels, the prediction score was the highest for the most abundant categories  
509 Purkinje\_defined\_EB (0.062) and Purkinje\_defined\_LB (0.046). Therefore, we standardised the prediction  
510 scores per group, and further filtered for the segments with a prediction score above the 1st quantile. As a  
511 result, we confidently assigned cell type labels to 65,355 (75%) of the 87,140 segments. For the predicted  
512 precisest labels presented in Fig. 2g (Purkinje subtypes), we required the segments to have a concordant cell  
513 type assignment (Purkinje cell). 36,531 (89%) of the 41,036 Purkinje cell segments had concordant and high  
514 confidence precisest label assignments, with 29,560 segments assigned as Purkinje\_defined\_EB and 6,971 as  
515 Purkinje\_defined\_LB.

## 516 517 **Immunohistochemistry.**

518 Mouse P7 brains were dissected, cut sagittally at the midline, fixed for 24 hours in 4% PFA at 4 °C,  
519 cryopreserved in 30% sucrose overnight at 4 °C, and embedded in Tissue-Tek OCT compound (Sakura

520 Finetek). Cryoblocks were stored at  $-80^{\circ}\text{C}$ .  $10\ \mu\text{m}$  sagittal sections were cut, collected on SuperFrost Plus  
521 slides (Fisher Scientific) and stored at  $-80^{\circ}\text{C}$  until use.

522 For indirect immunofluorescence, sections were blocked in 10% normal donkey serum (EMB Millipore) in  
523 PBS with 0.5% Triton X-100 for at least 30 minutes at room temperature. Primary antibodies were incubated  
524 overnight at room temperature in blocking solution. Sections were washed for 30 minutes with PBS with 0.5%  
525 Triton X-100, and incubated with secondary antibodies in blocking solution for 1 hour at room temperature.  
526 Tissue sections were mounted in ProLong Gold Antifade Mountant (Invitrogen). The primary antibodies were  
527 diluted as follows: mouse anti-HCRTR2 1:100 (R&D, Cat.No.: MAB52461), chicken anti-TBR2/EOMES  
528 1:500 (Millipore, Cat.No.: AB15894), and rabbit anti-LMX1A (1:1000; Sigma Aldrich, Cat.No.: AB10533).  
529 The secondary antibodies used were Donkey anti-Mouse IgG (H+L) Alexa Fluor 488 (Invitrogen, Cat.No.:  
530 A21202), Donkey anti-Mouse IgG (H+L) Alexa Fluor 568 (Invitrogen, Cat.No.: A10037), Donkey anti-Rabbit  
531 IgG (H+L) Alexa Fluor 488 (Invitrogen, Cat.No.: A21206), Donkey anti-Rabbit IgG (H+L) Alexa Fluor 568  
532 (Invitrogen, Cat.No.: A10042), and Goat Anti-Chicken IgY (H+L) Alexa Fluor 568 (Abcam,  
533 Cat.No.:ab175477).

534 For Immuno-SABER<sup>84</sup>, primary antibodies were first conjugated using photo-crosslinking oYo-Linker  
535 oligonucleotides (AlphaThera Inc.)  $1\ \mu\text{l}$  of the oYo-Linker was mixed with  $1\ \mu\text{g}$  of primary antibody and  
536 incubated for 2 hours under UV light on ice. After conjugation, the oligo-tagged antibodies were stored under  
537 the same conditions as the unconjugated antibodies. Primer-exchange reaction (PER) was used to extend  
538 primers into ssDNA concatemers as described<sup>85</sup>. Briefly, a primer overlapping with the oligonucleotide  
539 crosslinked to the antibody, and the respective hairpin oligonucleotide was designed. Reactions were carried  
540 out in  $100\ \mu\text{l}$  of 1xPBS,  $50\ \text{nM}$  -  $1\ \mu\text{M}$  hairpin oligonucleotides in  $10\ \mu\text{l}$  IDT-TE buffer,  $10\ \text{nM}$  Clean.G  
541 hairpin (CCCCGAAAGT GGCCTCGGGC CTTTGGCCC GAGGCCACTT TCG),  $300\ \mu\text{M}$  dATP, dCTP  
542 and dTTP (NEB),  $10\ \text{mM}$   $\text{MgSO}_4$ ,  $400\ \text{U/ml}$  Bst LF polymerase (McLab), and  $1\ \mu\text{M}$  primer. Before adding  
543  $10\ \mu\text{l}$  of  $10\ \mu\text{M}$  primer solution to the reaction, the reactions ( $90\ \mu\text{l}$ ) were pre-incubated for 15 minutes at  
544  $37^{\circ}\text{C}$ . The reactions were then incubated for 2 hours at  $37^{\circ}\text{C}$ , followed by heat-inactivation of the polymerase

545 for 20 min at 80 °C. Concatemers were purified and concentrated using MinElute Kit (Qiagen) and suspended  
546 in 25 µl water. The length of the concatemers was evaluated on 1 % E-Gel<sup>TM</sup> EX agarose gels (Thermo Fisher,  
547 Cat.No.: G401001). Gels were imaged using the SYBR Gold channel on a Typhoon FLA 9000 scanner. The  
548 following primary antibodies were used: rabbit anti-HCRTR2 (Alomone Labs; Cat.No.: AOR-002), rabbit  
549 anti-TBR2/EOMES (Millipore; Cat.No.: ABN1687) and rabbit anti-LMX1A (Sigma-Aldrich; Cat.No.:  
550 AB10533). The oligonucleotides conjugated to the antibodies were: 5'- TTCAGTTCTT GTATCGCGTC  
551 ACTTATCGGT TATTGTCCTC TCGC-3' for anti-HCRTR2, 5'-TTGTTTCCTA TATTTAGCGT  
552 CCGTGTCGTT CTCCCGCGCA ACAG-3' for anti-LMX1A, and 5'-TTAACAATTC AGCTCCGCCT  
553 TATACCGTCT TACCGCCAAC ATCG-3' for anti-TBR2/EOMES. The extension primers were as follows:  
554 5'-GCGAGAGGAC AATAACCGAT AAGTGACGCG ATACAAGAAC TGTTTTTATT CATTTACATT  
555 CATTTAC-3' for anti-HCRTR2, 5'- CTGTTGCGCG GGAGAACGAC ACGGACGCTA AATATAGGAA  
556 ACTTTTTACA TCATCATA CA TCATCAT-3' for anti-LMX1A, and 5'- CGATGTTGGC  
557 GGTAAGACGG TATAAGGCGG AGCTGAATTG TTTTTTTACT CTACTACACT CTACTAC-3' for  
558 anti-TBR2/EOMES. The hairpin oligonucleotides were as follows: 5'-ATTCATTTAC GGGCCTTTTG  
559 GCCCGTAAAT GAATGTAAAT GAA-3'/InvdT/ for anti-HCRTR2, 5'- ACATCATCAT GGGCCTTTTG  
560 GCCCATGATG ATGTATGATG ATG-3'/InvdT/ for anti-LMX1A, and 5'- ACTCTACTAC  
561 GGGCCTTTTG GCCCGTAGTA GAGTGTAGTA GAG-3'/InvdT/ for anti-TBR2/EOMES.

562 For Immuno-SABER stainings, cryoslides were thawed for ~5 minutes at room temperature, and washed twice  
563 in PBS. For permeabilization and blocking, the slides were incubated in blocking buffer containing 4 mM  
564 EDTA, 0.1% dextran sulphate, 0.5 mg/ml sheared salmon sperm, 100 µM random blocking oligos, 0.5%  
565 Triton X-100 and 10% normal donkey serum in PBS for 3x10 minutes. Primary antibodies were hybridised  
566 with three 14 nt oligos complementary to the crosslinked oligo-tag to reduce nonspecific binding. 0.2 µl of  
567 each 100 µM oligo was mixed with the conjugated primary antibody in 10 µl of 4 mM EDTA, 0.1% dextran  
568 sulphate, 0.5 mg/ml sheared salmon sperm, 0.5% Triton X-100 and 10% normal donkey serum in PBS, and  
569 rotated for 30 minutes at room temperature. Next, the antibody mixture was applied to the slides and incubated

570 overnight at 4 °C. The final dilution of the antibodies (respective to the original stock) was as follows: rabbit  
571 anti-HCRTR2 1:100, rabbit anti-TBR2/EOMES 1:1000, and rabbit anti-LMX1A 1:500. The slides were then  
572 washed once with blocking buffer (5 min), three times with 0.5% Triton X-100 and 10% normal donkey serum  
573 in PBS (a' 10 min), and two times with PBS (a' 5 min). Primary antibodies were then post-fixed using 5 mM  
574 BS3 (Thermo Scientific, Cat.No.: 21580) in PBS for 30 minutes at room temperature. After three washes with  
575 PBS (a' 5 min), 60% formamide was used to remove the 14 nt oligos on the primary antibodies. The formamide  
576 was exchanged every 3 minutes for a total of 12-15 minutes. After three washes with PBS (a' 5 min), PER  
577 concatemers were hybridised to the primary antibodies. PER concatemers were diluted 1:25 in PER buffer  
578 containing 20% formamide, 10% dextran sulphate, 0.1% Tween-20, 2x saline sodium citrate, 0.5 mg/ml  
579 sheared salmon sperm, and incubated for 1 h at 37 °C. Removal of leftover PER concatemers was done by  
580 washing with 0.5% Triton X-100 in PBS for 10 minutes at 37 °C, followed by washing in 45% formamide in  
581 PBS for 5 minutes wash at room temperature and three 10 minutes washes with 0.5% Triton X-100 in PBS at  
582 37 °C. Fluorophore-labelled imagers (IDT) were incubated at 1 µM in 0.5% Triton X-100 in PBS for 30  
583 minutes at room temperature in the dark. The following imagers were used: 5'-/ATTO565N/tt  
584 GTAAATGAAT GTAAATGAAT-3'/InvdT/ for anti-HCRTR2, 5'-/Alex647N/tt ATGATGATGT  
585 ATGATGATGT-3'/InvdT/ for anti-LMX1A, and 5'-/ATTO565N/tt GTAGTAGAGT GTAGTAGAGT-  
586 3'/InvdT/ for anti-TBR2/EOMES. DAPI was used to counterstain DNA, samples were mounted in SlowFade  
587 antifade Gold Mountant (Invitrogen), and the coverslips were secured with FixoGum (Marabu). Images were  
588 acquired using a Leica Thunder System widefield microscope with an HC PL APO 20x/0.8 DRY objective.  
589 The images were acquired as z-Stacks with 0.5 µm step. ATTO565N was visualised using a 546 nm laser and  
590 Alexa 647N was visualised using a 633-nm laser.

591

## 592 **Gene expression scores.**

593 To quantify the expression of a group of genes of interest (GOI), we calculated gene expression scores akin  
594 to the approach used by La Manno *et al.*<sup>18</sup>. UMI data was normalised by calculating counts per million (CPM),



595 and subsetted for the GOI. Next, we scaled the genes' expression vectors to mean zero and unit variance, we  
596 averaged the scaled expression of all GOI to compute the score and calculated its 0.01 and 0.99 percentile.  
597 These percentiles were used for capping the score to eliminate outliers. Values outside this boundary were  
598 assigned to the nearest accepted value. This approach was used to quantify the expression of genes related to  
599 cell cycle<sup>18</sup> (Extended Data Figs. 6g and 7a) or genes that gained expression in different cell types in the  
600 human lineage (Fig. 4g, Extended Data Fig. 12a,b).

601

### 602 **Cell type lineage assignments for ventricular zone neuroblasts.**

603 Although the VZ neuroblasts could not be separated into the associated terminal cell types (parabrachial and  
604 noradrenergic cells, GABAergic deep nuclei neurons, Purkinje cells, interneurons) based on clustering, we  
605 observed differential expression of known lineage-specific marker genes between developmental stages, in  
606 line with the known temporal order of the emergence of these cell types in the cerebellar ventricular zone<sup>6,20</sup>.  
607 We thus further split the mouse VZ neuroblasts based on their developmental stage: E10.5 cells were assigned  
608 to the parabrachial/noradrenergic cell type lineage, E11.5 cells to GABAergic deep nuclei neuron lineage,  
609 E12.5 and E13.5 to Purkinje cell lineage, and all other cells into interneuron lineage. In human,  
610 VZ\_neuroblast\_3 cells from Carnegie stage 18 were assigned to the parabrachial/noradrenergic cell type  
611 lineage, VZ\_neuroblast\_1 cells from Carnegie stages 18-19, VZ\_neuroblast\_2 cells from Carnegie stages 18-  
612 22 and VZ\_neuroblast\_3 cells from Carnegie stages 19-22 were assigned to the Purkinje cell lineage, and all  
613 other VZ neuroblasts to the interneuron lineage. In opossum, some VZ neuroblast subclusters could be  
614 assigned based on marker genes: cells in *LMX1A* and/or *LMX1B* positive subclusters (orig.cl\_27\_3,  
615 orig.cl\_39\_0, orig.cl\_39\_1, orig.cl\_39\_6) were assigned to the parabrachial/noradrenergic cell type lineage,  
616 and cells in *PAX2* and/or *SLC6A5* positive subclusters (orig.cl\_23\_9, orig.cl\_26\_10, orig.cl\_31\_2,  
617 orig.cl\_31\_4, orig.cl\_31\_5) to the interneuron lineage. The rest of opossum VZ neuroblasts were split based  
618 on their developmental stage: E14.5 and P1 cells were assigned to the GABAergic deep nuclei neuron lineage,  
619 P4 and P5 cells to Purkinje cell lineage, and P14 and P21 cells to the interneuron lineage. These assignments

620 were used to visualize the VZ cell type lineages and to study the expression patterns of cell type marker genes  
621 amongst the VZ neuroblasts (Extended Data Fig. 3g,h), to perform LIGER integration for Purkinje and  
622 interneuron cell type lineages within each species (Fig. 2a, Extended Data Fig. 3o), and to integrate cells in  
623 Purkinje cell type lineage across species (Fig. 3d, Extended Data Fig. 9a; see also *Pseudotemporal ordering*).

624

### 625 **Integration of data by subsets.**

626 For visualization purposes we integrated data by different subsets of cells belonging to a broad lineage, to a  
627 cell type lineage, or to a developmental stage. In this analysis, interneurons from adult human deep nuclei  
628 samples (n=57) were not included in the human interneuron subset, given that these were low in numbers, co-  
629 clustered with the molecular layer interneurons, and were not distinguished in adult mouse and opossum  
630 datasets, for which we only sampled whole cerebella. The integration of different subsets was performed as  
631 described for the whole datasets (see *Data integration and clustering*) using LIGER<sup>14</sup>. The number of  
632 components used for integrative non-negative matrix factorization (*optimizeALS* function) was as follows:  
633 Purkinje cell type lineage in mouse k=70, human k=50, opossum k=70 (Fig. 2a); interneuron cell type lineage  
634 in mouse k=15, human k=20, opossum k=20 (Extended Data Fig. 3o); VZ broad lineage in mouse k=40,  
635 human k=50, opossum k=30 (Extended Data Fig. 3c,h); RL/NTZ broad lineage in mouse k=15, human k=15,  
636 opossum k=15 (Extended Data Fig. 4c,g); RL/EGL broad lineage in mouse k=30, human k=40, opossum k=40  
637 (Extended Data Fig. 5c,f); glia broad lineage in mouse k=30, human k=40, opossum k=70 (Extended Data  
638 Fig. 6d). For the integration of individual developmental stages (Extended Data Figs. 3j, 7b) we used k=25.

639

### 640 **Cross-species correlations and comparisons to the adult mouse data.**

641 To match cell states and subtypes across species, we calculated Spearman correlation coefficients for all cross-  
642 species pairs within a subset (a broad lineage or a cell type). Interneurons from adult human deep nuclei (n=57)  
643 were excluded from this analysis (see also *Integration of data by subsets*). We required at least 50 cells, and  
644 subsampled up to 1000 cells per category. We used only the 1:1 orthologous genes that were overdispersed  
645 within a subset in each of the three species (i.e. intersect of highly variable genes). The number of the used

646 genes for each subset is specified in the figure legends (Fig. 2d, Extended Data Figs. 3d,t, 4d,k, 5d,g, and 6e,f).  
647 Importantly, these analyses should not be used to make conclusions about the differences in evolutionary  
648 conservation of the individual categories, given that the comparisons are limited to the intersect of highly  
649 variable genes, and might be affected by imperfect matching between the developmental stages we sampled  
650 as well as between the individual subtype/state categories defined in each species. The latter is especially true  
651 for the cell states that form a differentiation continuum as we cannot exclude slight shifts in the borders of  
652 these categories between the species.

653 We used the same approach to match mouse Purkinje and granule cell developmental subtypes defined in this  
654 study to the adult subtypes reported by Kozareva *et al.*<sup>7</sup>, using all mouse genes that were overdispersed in both  
655 datasets (i.e. intersect of highly variable genes; Extended Data Figs. 3m,s, and 5k). We note that the adult  
656 mouse dataset<sup>7</sup> was produced by methods similar to the ones used in this study: nuclei were extracted from  
657 frozen tissue samples dissected from different lobules of the cerebellar cortex and the libraries were prepared  
658 using v3 Chromium reagents (10x Genomics).

659

### 660 **Principal components analysis.**

661 To evaluate global relationships among the cell type-specific transcriptomes during development in the three  
662 species, we performed principal components analysis (PCA) using three-way 1:1 orthologous genes. Cells  
663 originating from the same biological replicate and assigned to the same cell type were merged into  
664 pseudobulks by summing up the UMI counts per gene. Only pseudobulks that contained at least 150 cells were  
665 considered. Only genes which were expressed in at least 10% of cells in a single pseudobulk in any species  
666 and showed variability in all species ( $\text{variance}(\text{CPM}) > 0$ ) were kept for downstream analysis. The data was  
667 normalized to CPM and gene expression was median-centered within each species and aggregated. The first  
668 15 principal components of the merged dataset were approximated using *prcomp\_irlba* (irlba<sup>86</sup> v2.3.3, R).

669

## 670 **Marker gene identification.**

671 To identify genes enriched in different cell states, term frequency - inverse document frequency (TF-IDF)  
672 transformation was applied (quickMarker function from the R package SoupX)<sup>87</sup>. *P*-values were computed  
673 using a hypergeometric test and corrected with the Benjamini Hochberg method. The count matrix was  
674 binarized with a threshold of > 0 UMI per cell. For each gene its expression within a specific group of cells  
675 was contrasted against all other cells in the dataset.

676 Conserved marker genes were called using an adjusted dataset. To reduce the effect of sampling differences  
677 between species, the data was aligned between the species: for each cell state, only those matched  
678 developmental stages were used, where at least 50 cells were present in all three species. Next, each cell state  
679 per matched developmental stage was sampled to 1,000 cells, if needed the group was randomly upsampled.  
680 This dataset was then used for marker gene identification as described above. Conserved markers were defined  
681 as genes that are enriched in all species in the same cell state with a corrected *P*-value of less than 0.01, display  
682 cell state-specific enrichment of > 2 and show expression (UMI > 1) in at least 10% of the cells. Conserved  
683 markers were ranked by maximum scaling the TF-IDF value per species and calculating a score as follows:

$$684 \quad S_j = \sqrt{t_{j,Human}^2 + t_{j,Mouse}^2 + t_{j,Opposum}^2},$$

685 where *t* is the scaled TF-IDF value and *S* the ranking score per gene *j*.

686

## 687 **Pseudotemporal ordering.**

688 We extracted from all three datasets the cells that were assigned to the Purkinje cell (Extended Data Fig. 3g,h)  
689 or granule cell (Extended Data Fig. 5c) lineage. We only used the three-way 1:1 orthologous genes that were  
690 detectable (number of UMIs > 0) in all species. We aligned the data from all species in the low dimensional  
691 space of 50 principal components using the Harmony pipeline<sup>88</sup> (v1.0). Library and species identities were  
692 used as covariates. Next, we chose a starting cell, based on the UMAP embedding, and applied the SCANPY  
693 implementation of diffusion pseudotime<sup>37</sup> (DPT) algorithm. Specifically, we used the Harmony-corrected  
694 principal components as input for the diffusion map algorithm and projected the cells into a ten-dimensional

695 diffusion map, which together with the previously selected root cell was used as an input for the estimation of  
696 DPT values. Of note, the UMAP embedding of granule cells (Fig. 3d, Extended Data Fig. 9a,c) shows a gap  
697 between the differentiating and defined granule cells but this 2D representation does not influence the  
698 estimation of DPT values in the ten-dimensional diffusion map.

699

## 700 **Gene expression trajectories.**

701 We used the cross-species aligned pseudotemporal cell orderings to model gene expression trajectories in all  
702 three species. First, we split the pseudotime vector into ten equally sized bins. For each bin, pseudobulks  
703 consisting of cells from the same biological replicate were merged by summing up the UMIs per gene, only  
704 considering the replicates where the number of cells was at least 50. Next, we determined for each pseudotime  
705 bin and species the mean UMI counts between the biological replicates. To identify the genes that are dynamic  
706 during neuronal differentiation, we filtered for highly variable genes (as described in *Identification of*  
707 *overdispersed genes*) using the pseudotime binned UMIs. In this case we set  $\alpha$  in the highly variable gene  
708 formula (see above) to 1. Selection was done per species and the intersection of dynamic genes across species  
709 was used in the next steps. The count matrix was normalised, using all genes, to counts per million (CPM),  
710 subsetted for the highly variable genes and combined such that each orthologue was added as an individual  
711 feature, i.e. each gene appeared three times in the matrix, one time for each species. To infer groups of genes  
712 with similar trajectories, we used the soft clustering algorithm Mfuzz<sup>89</sup> (v2.44.0) and clustered the genes into  
713 eight trajectory clusters. For each orthologue we determined its center of mass to infer its most prominent  
714 expression time window (Extended Data Figs. 9g, 10a). To order the trajectory clusters, we calculated the  
715 mean center of mass of all confident cluster members (cluster membership score > 0.5). The similarity of  
716 orthologues' trajectories was tested by calculating a similarity  $P$ -value from the cluster membership score:

$$p(x, y) = \sum_{i=1}^k m_{xi} m_{yi},$$

717

718 where  $m_{xi}$  and  $m_{yi}$  is the cluster membership score for cluster  $i$  for the given orthologues from two species ( $x$   
719 and  $y$ ). The resulting  $P$ -value was adjusted for multiple testing using Benjamini-Hochberg method. Based on  
720 a set of rules, the orthologues were classified in multiple classes:

$$721 \quad class \begin{cases} \text{x specific,} & \text{if } p(x, y) < 0.05 \wedge p(x, z) < 0.05 \wedge p(y, z) > 0.5 \wedge c_y = c_x \\ \text{preserved,} & \text{if } c_x = c_y \wedge c_x = c_z \wedge c_y = c_z \wedge p(x, y) > 0.5 \wedge p(y, z) > 0.5 \\ \text{diverse,} & \text{if } p(x, y) < 0.05 \wedge p(x, z) < 0.05 \wedge p(y, z) < 0.05 \\ \text{intermediate,} & \text{otherwise} \end{cases}$$

722 where  $x, y, z$  represent the studied species in any given combination,  $p(x, y)$  is the adjusted  $P$ -value for the  
723 comparison of the given orthologues in species  $x$  and  $y$ ,  $c_x$  the cluster with the maximum membership score  
724 for the studied orthologue in species  $x$  (human-specific, mouse-specific, marsupial). If one or more of the  
725 three orthologues did not reach a maximum membership score above 0.5, the gene was excluded from  
726 downstream analysis. Orthologous genes with either species-specific or diverse trajectories were grouped into  
727 the ‘diverged’ class (Fig. 3g).

728 We additionally measured the similarities between the trajectories of the orthologous genes by computing  
729 dynamic time warping distances (dtw<sup>78</sup> v1.20, R). Comparison of these distances for the groups of genes with  
730 either preserved, intermediate or diverged trajectories corroborated the clustering-based classification  
731 (Extended Data Fig. 9h). We further assessed the maximum and minimum pairwise dynamic time warping  
732 distances between the trajectories of the orthologues, to provide a quantitative measure of the amount of  
733 change for each gene (Figure 4c, Extended Data Fig. 10c).

734 The patterns of trajectory changes during Purkinje or granule cell differentiation were visualised using alluvial  
735 plots (ggalluvial<sup>90</sup> v0.12.3, R). For both cell types, each orthologous gene was mapped to its trajectory cluster  
736 in each species, and coloured according to its trajectory cluster in human (Fig. 4a, Extended Data Fig. 10b).

737

### 738 **Presence/absence expression differences.**

739 To assess presence and absence of gene expression in cerebellar cell types, we generated pseudobulks by  
740 summing up exonic UMI counts (mature mRNA reference, expressed orthologous genes) per biological  
741 replicate, and cell type (astroglia, oligodendrocytes, GABAergic deep nuclei neurons, Purkinje cells,

742 interneurons, glutamatergic deep nuclei neurons, granule cells, UBCs, NTZ neuroblasts, isthmic nuclei  
743 neurons, NTZ mixed cells, VZ neuroblasts, parabrachial cells, meningeal cells, and immune cells). For the  
744 meningeal and immune cell types, we summed up the counts from all cells in the dataset, because of their low  
745 abundance. We used the mature mRNA counts in this analysis, since most of the intronic reads arise due to  
746 internal priming from intronic polyA and polyT sequences<sup>91</sup> that can differ between the species. For each cell  
747 type, we only considered those matched developmental stages, for which there was data from all three species;  
748 and only those pseudobulks that had at least 50 cells. We normalized the data to CPM. In each species, we  
749 required a gene to reach a cutoff 50 CPM in at least 2 pseudobulks of a given cell type (or the single pseudobulk  
750 generated for meningeal or immune cells), to consider it as reliably expressed (Extended Data Fig. 11a). For  
751 genes failing to meet this cutoff, i.e. not reliably expressed in any of the cell types, we also considered their  
752 expression in bulk RNA-seq RPKM-normalized data covering overlapping stages of cerebellum development  
753 in the same species<sup>19</sup>. Genes not detected as reliably expressed in the cerebellum (in any cell type) based on  
754 our snRNA-seq data but reaching a RPKM value above 5 in the bulk RNA-seq data, were assumed to be  
755 affected by technical artefacts of the snRNA-seq measurements. In these cases, we removed the orthologous  
756 gene group from the downstream analysis. We further considered possible biases stemming from evolutionary  
757 divergence of the sequences and differences in gene annotation quality between the species (GC content,  
758 length), which could affect the efficiency of reverse transcription, PCR-amplification, and/or mapping of the  
759 sequences. We determined the maximum expression of each gene across all pseudobulks in each species, and  
760 compared the cross-species fold differences in gene's maximum expression to differences in gene length and  
761 GC content. We did not observe any strong correlation between fold difference in a gene's maximum  
762 expression and fold difference in its median-adjusted exonic length (human-mouse Pearson's  $r=0.07$ , human-  
763 opossum  $r=0.11$ , mouse-opossum  $r=0.06$ ), 3'UTR length (human-mouse  $r=0.07$ ), exonic GC content (human-  
764 mouse  $r=-0.01$ , human-opossum  $r=-0.01$ , mouse-opossum  $r=-0.02$ ) or 3'UTR GC content (human-mouse  
765  $r=0.01$ ). Nevertheless, in our initial analyses we observed that genes we called as expressed in a species-  
766 specific manner tend to be longer (exonic length) in the species where expression is present compared to their

767 orthologous in species where expression is absent, indicating some length bias in detection sensitivities in the  
768 Chromium snRNA-seq data, as also noted previously<sup>92</sup>. Therefore, to reduce the effects of these biases in our  
769 cross-species comparisons, we removed the orthologous gene groups that show major differences in exonic  
770 length between the species. For this, we first calculated pairwise median-adjusted differences in exonic lengths  
771 of orthologous genes. Median-adjustment is necessary to consider global differences in exonic length between  
772 the species (global shifts are accounted for by the CPM normalisation). We only considered orthologous gene  
773 groups for which the pairwise adjusted exonic length fold differences were less than 3 (Extended Data Fig.  
774 11a). In the comparative analyses of all three species (human, mouse, opossum), 5,693 genes were affected  
775 by the technical limitations related to gene detection and/or annotation in at least one of the species and  
776 removed, whereas 7,062 1:1 orthologous genes were kept in the downstream analysis (Extended Data Fig.  
777 11g). In a separate comparison of human and mouse only, 4,135 genes were removed because of these  
778 technical limitations, and 8,620 genes were kept in the downstream analysis.

779 We then focused on the main glial and neuronal cell types in the cerebellum (astroglia, oligodendrocytes,  
780 GABAergic deep nuclei neurons, Purkinje cells, interneurons, glutamatergic deep nuclei neurons, granule  
781 cells, UBCs) to evaluate presence/absence of expression of three-way 1:1 orthologous genes. If a gene's  
782 expression in two pseudobulks within a matched developmental stage reached the cutoff of 50 CPM, we  
783 assumed the gene to be reliably expressed in this cell type (Extended Data Fig. 11a). Next, in each species we  
784 determined the maximum expression of each gene per cell type across all matched stages, and calculated the  
785 ratio to overall maximum expression within the species, and pairwise fold differences between the orthologues  
786 from different species (Extended Data Fig. 11a,b). The within-species comparison serves to reduce the effects  
787 of possible biases in the detection sensitivities between the species. We called a gene “present”, when it was  
788 reliably expressed in the cell type and its maximum expression levels in the cell type reached 30% of maximum  
789 expression levels across all cell types in that species (Extended Data Fig. 11a,b). We called a gene “absent”,  
790 when it was not reliably expressed in the cell type and its maximum expression levels in a cell type were below  
791 30% of maximum expression levels across all cell types or the gene was not reliably expressed in the



792 cerebellum (not expressed in any cell type) in that species. Each orthologous gene group was then classified  
793 in each cell type according to the following rules: (I) a gene is considered to have conserved expression if it  
794 is “present” in all studied species; (II) a gene is considered as being expressed in a species-specific manner, if  
795 it is “present” in the focal species, “absent” in other species, and the pairwise fold-differences are more than  
796 five-fold; (III) a gene is classified as not expressed in a species-specific manner, if it is “absent” in the focal  
797 species, “present” in other species, and the pairwise fold-differences are more than five-fold; (IV) a gene is  
798 classified as not expressed (low) if it is “absent” in all studied species; (V) the remaining genes were assigned  
799 as “not classified”.

800 In the comparative analyses of all three species (human, mouse, opossum), we polarized the presence/absence  
801 expression differences between mouse and human, using opossum as an outgroup species, and assigned the  
802 genes as having gained or lost expression in the mouse or human lineage. The differences between the  
803 eutherian and marsupial lineages cannot be polarized, because of the lack of a non-therian outgroup. Thus, if  
804 a gene is only expressed in opossum, we classified it as *marsupial-expressed*. Similarly, if a gene is not  
805 expressed specifically in opossum, we classified it as *eutherian-expressed*. In a comparison of human and  
806 mouse only, the genes with presence/absence expression differences were classified as *mouse-expressed* and  
807 *human-expressed*.

808 For each pair of species, we compared exonic length and GC content ratios among the genes within different  
809 presence/absence call classes, and used random forest models with exonic length and GC content as predictors  
810 to test if these could explain the presence/absence differences we called based on expression. The models were  
811 used with default parameters as implemented in scikit-learn (v1.1.1, python v3.9) RandomForestClassifier.  
812 As noted above, we detected some exonic length bias within the calls (Extended Data Fig. 11c). The length  
813 bias, however, could have both biological and technical sources, and random forest models were not able to  
814 predict the presence/absence expression differences between the species based on exonic length and GC  
815 content of the genes, indicating that these are not driving our calls (Extended Data Fig. 11d). We also evaluated  
816 the possible effects of using different 10x Chromium chemistry versions (v2 and v3) for data production on

817 classifying expression differences. For this we focussed on a subset of human and mouse datasets that have at  
818 least 2 biological replicates produced with Chromium v2 (E13.5, E14.5, E15.5, P7, P14 in mouse, and  
819 corresponding stages in human). We then replaced one of the human v2 replicates from each stage with a  
820 replicate produced with Chromium v3, and called presence/absence expression differences in the two subsets  
821 (mouse v2 : human v2, and mouse v2 : human v2/3) using the pipeline described above. Similar numbers of  
822 expression differences were detected using the two subsets (Extended Data Fig. 11f), indicating that our  
823 approach is robust to differences in Chromium versions.

824

### 825 **Gene expression cell type-specificity.**

826 To evaluate the cell type specificity of gene expression (Extended Data Fig. 11i), we determined specificity  
827 index  $\tau$ , a metric described previously for evaluation of tissue-specificity<sup>93</sup>:

$$\tau = \frac{\sum_{i=1}^n 1 - \hat{x}_i}{n - 1}$$
$$\hat{x}_i = \frac{x_i}{\max(x)}$$

828

829 where  $x$  is the normalized expression value for a certain gene across multiple cell types within a given species;  
830  $x_i$  is the cell type  $i$  specific expression value;  $n$  is the total number of observed cell types. We determined the  
831  $\tau$  separately for each species using all cell types that were considered in the analysis of presence/absence  
832 expression differences (astroglia, oligodendrocytes, GABAergic deep nuclei neurons, Purkinje cells,  
833 interneurons, glutamatergic deep nuclei neurons, granule cells, UBCs). The index value 0 indicates broad  
834 expression, and 1 cell type-specific expression.

835

### 836 **Gene ontology and pathway enrichment analyses.**

837 For gene ontology and pathway enrichment analyses we used the WebGestaltR<sup>94</sup> package (version 0.4.4) and  
838 mouse functional databases of gene ontology and KEGG pathways as provided by WebGestalt (daily build  
839 accessed on 01.14.2019). The terms reported for principal components analyses (Fig. 3a and Extended Data

840 Fig. 8c) were identified as enriched (FDR<0.1) by gene set enrichment analyses based on gene loadings to  
841 principal components, and databases gene ontology *biological process noRedundant* and *KEGG*. Functional  
842 enrichments among the conserved markers (Extended Data Fig. 8f, Supplementary Table 9) were identified  
843 by over-representation analysis against the background of three-way 1:1 orthologues detected in all species  
844 (FDR < 0.05) using the functional databases *biological process noRedundant*, *molecular function*  
845 *noRedundant*, *cellular component noRedundant*, and *KEGG*. The molecular function terms, enriched among  
846 all conserved markers (Extended Data Fig. 8f), were manually grouped into broad categories. For each broad  
847 term category, we tested the enrichments among the conserved markers of individual cell states using  
848 hypergeometric tests and adjusted *P*-values using Benjamini-Hochberg method (Extended Data Fig. 8g). The  
849 gene lists for the respective terms were extracted from the WebGestalt<sup>94</sup> databases, the transcription factor list  
850 was downloaded from the animal TFDB (v.3.0)<sup>61</sup>.

851 Functional enrichments among the genes with preserved trajectories assigned to different trajectory classes  
852 (Fig. 3f, Extended Data Fig. 9f) and among the genes with trajectory changes assigned to different lineages  
853 (Supplementary Table 12) were identified by over-representation analysis against the background of dynamic  
854 orthologous genes (FDR < 0.1). Functional enrichments among the genes with presence/absence expression  
855 differences in cerebellar cell types (Supplementary Table 12) were identified by over-representation analysis  
856 against the background of 7,047 orthologous genes included in the analysis (see *Presence/absence expression*  
857 *differences*; FDR < 0.1). Databases *biological process*, *molecular function*, *cellular component*, and *KEGG*  
858 were used.

859

### 860 **Inference of transcription factor regulon activities**

861 Transcription factor activities in mouse and human were estimated using the pySCENIC<sup>36,95</sup> pipeline. For  
862 computational purposes we subsampled the human dataset by keeping two (SN021 and SN105) out of the nine  
863 8 wpc libraries (9581 out of 39 300 cells), resulting in a dataset of 151 237 cells. The whole mouse dataset  
864 was used. The cisTarget databases *500bpUp100Dw* (500 bp upstream and 100 bp downstream of the

865 transcription start site (TSS)) and *TSS±10kb* (10 kb upstream and downstream of the TSS) for mouse (mm10)  
866 and human (hg38), as well as the transcription factor to motif tables (version 9) were retrieved from the  
867 cisTarget website (<https://resources.aertslab.org/cistarget/>). Gene regulatory networks were inferred using  
868 pySCENIC *grn* with the default settings. pySCENIC *ctx* was run with *min\_genes* = 5, and *aucell* with the  
869 default settings. For each transcription factor, regulon activities (AUC scores) were z-scored across cell states.  
870

### 871 **Adult bulk RNA-sequencing data analyses.**

872 The adult brain and cerebellum bulk RNA-sequencing data from nine mammals and chicken is from Brawand  
873 *et al.*<sup>47</sup>. We used the reference genomes and orthology relationships from Ensembl release 91. Gene expression  
874 levels were measured as described by Wang *et al.*<sup>60</sup>. Briefly, for each gene we measured expression levels in  
875 the fragments per kilobase of coding DNA sequence (CDS) per million uniquely CDS-aligning reads (FPKM),  
876 a unit which corrects for both gene length and sequencing depth. We restricted the analysis to the coding  
877 regions of the longest protein-coding isoform of 1:1 orthologues that perfectly align across species.

878

### 879 **Essential and disease-associated genes.**

880 As a metrics of gene essentiality we used LOEUF scores (loss-of-function observed/expected upper bound  
881 fraction)<sup>39</sup> from the Genome Aggregation Database (gnomAD v2.1.1;  
882 <https://gnomad.broadinstitute.org/downloads#v2-constraint>), which ranks genes along a continuous spectrum  
883 of tolerance to loss-of-function variation based on human exome and genome sequencing data (*in vivo*). We  
884 obtained the human inherited disease gene list from the manually curated Human Gene Mutation Database  
885 (HGMD, PRO 17.1)<sup>41</sup>, and only used genes with disease-causing mutations as described previously<sup>40</sup>. We  
886 used the genes that based on the mapping to the Unified Medical Language System (UMLS) were linked to  
887 the high level disease types ‘Nervous system’ or ‘Psychiatric’, and split these genes into two groups based on  
888 whether a gene was also linked to the high level disease type ‘Developmental’ (developmental n=373; other  
889 n=200). We obtained the cerebellum-linked disease gene lists from two sources. First, the curated lists of

890 genes associated with neurodevelopmental and adult-onset neurodegenerative disorders linked to cerebellar  
891 dysfunction are from Aldinger *et al.*<sup>13</sup>. Briefly, the cerebellar malformation list includes 54 genes combining  
892 published Dandy–Walker malformation and cerebellar hypoplasia genes and genes identified through exome  
893 sequencing; the Joubert syndrome list includes 42 published Joubert syndrome genes; the autism spectrum  
894 disorder list includes 108 high-confidence genes identified through exome and genome sequencing; the  
895 intellectual disability list includes 186 genes identified through exome sequencing; the spinocerebellar ataxia  
896 list includes 44 genes associated with OMIM phenotype PS164400. Second, the lists of driver genes associated  
897 with paediatric cancers is based on Gröbner *et al.*<sup>42</sup> and include 53 genes for medulloblastoma, 8 genes for  
898 ependymoma and 24 genes for pilocytic astrocytoma and pleomorphic xanthoastrocytoma.

899 Significance of categorical enrichments were evaluated using binomial tests using all dynamic genes as the  
900 background gene set (see *Identification of overdispersed genes* and *Gene expression trajectories*). Continuous  
901 differences were investigated using a permutation test (10,000 iterations) for  $H_1 = \text{smaller}$  (LOEUF score).  
902 *P*-values were adjusted for multiple testing using Benjamini-Hochberg method.

903

#### 904 **General statistics and plots.**

905 All statistical analyses and graphical representations were done in R (v.3.6.3 or v.4.1.2) using the R packages:  
906 tidyverse<sup>96</sup> v1.3.0; SingleCellExperiment<sup>97</sup> v1.6.0; liger<sup>14</sup> v0.4.6; rliger<sup>98</sup> v1.0.0; batchelor<sup>65</sup> v1.0.1;  
907 pheatmap<sup>99</sup> v1.0.12; ggplot2<sup>100</sup> v3.3.2.; ggExtra v0.10.0. Additionally, the following Python (v3.6) packages  
908 were used: scanpy<sup>101</sup> v1.5.1; htseq<sup>102</sup> v0.13.5.

909

#### 910 SUPPLEMENTARY REFERENCES

- 911 56. Palkovits, M. Microdissection of Individual Brain Nuclei and Areas. in *General Neurochemical*  
912 *Techniques* (eds. Boulton, A. A. & Baker, G. B.) *Neuromethods* 1–17 (1985). doi:10.1385/0-89603-075-x:1.
- 913 57. Krishnaswami, S. et al. Using single nuclei for RNA-seq to capture the transcriptome of postmortem  
914 neurons. *Nature Protocols* **11**, 499–524 (2016).
- 915 58. Attar, M. et al. A practical solution for preserving single cells for RNA sequencing. *Scientific Reports* **8**,  
916 2151 (2018).

917 59. Cunningham, F. et al. Ensembl 2019. *Nucleic Acids Res* **47**, gky1113- (2018).

918 60. Wang, Z.-Y. et al. Transcriptome and translome co-evolution in mammals. *Nature* **588**, 642–647  
919 (2020).

920 61. Hu, H. et al. AnimalTFDB 3.0: a comprehensive resource for annotation and prediction of animal  
921 transcription factors. *Nucleic Acids Res* **47**, gky822 (2018).

922 62. Scrucca, L., Fop, M., Murphy, T. B. & Raftery, A. E. mclust 5: Clustering, Classification and Density  
923 Estimation Using Gaussian Finite Mixture Models. *R J* **8**, 289–317 (2016).

924 63. Wolock, S. L., Lopez, R. & Klein, A. M. Scrublet: Computational Identification of Cell Doublets in  
925 Single-Cell Transcriptomic Data. *Cell Syst* **8**, 281-291.e9 (2019).

926 64. Melville, J. uwot: The Uniform Manifold Approximation and Projection (UMAP) Method for  
927 Dimensionality Reduction. *R package version 0.1.10*. <https://CRAN.R-project.org/package=uwot> (2020).

928 65. Haghverdi, L., Lun, A. T. L., Morgan, M. D. & Marioni, J. C. Batch effects in single-cell RNA-  
929 sequencing data are corrected by matching mutual nearest neighbors. *Nat Biotechnol* **36**, 421–427 (2018).

930 66. Zeisel, A. et al. Molecular Architecture of the Mouse Nervous System. *Cell* **174**, 999-1014.e22 (2018).

931 67. Visel, A., Thaller, C. & Eichele, G. GenePaint.org: an atlas of gene expression patterns in the mouse  
932 embryo. *Nucleic Acids Res* **32**, D552–D556 (2004).

933 68. Diez-Roux, G. et al. A High-Resolution Anatomical Atlas of the Transcriptome in the Mouse Embryo.  
934 *Plos Biol* **9**, e1000582 (2011).

935 69. Hashimoto, R. et al. Origins of oligodendrocytes in the cerebellum, whose development is controlled by  
936 the transcription factor, Sox9. *Mech Develop* **140**, 25–40 (2016).

937 70. Perlman, K. et al. Developmental trajectory of oligodendrocyte progenitor cells in the human brain  
938 revealed by single cell RNA sequencing. *Glia* (2020) doi:10.1002/glia.23777.

939 71. Hao, Y. et al. Integrated analysis of multimodal single-cell data. *Cell* **184**, 3573-3587.e29 (2021).

940 72. Kharchenko, P., Petukhov, V. & Biederstedt, E. leidenAlg: Implements the Leiden Algorithm via an R  
941 Interface. *R package version 1.0.5*. <https://github.com/kharchenkolab/leidenAlg> (2021).

942 73. Team, S. D. RStan: the R interface to Stan. *R package version 2.21.2* <http://mc-stan.org/> (2020).

943 74. Meredith, M. & Kruschke, J. HDInterval: Highest (Posterior) Density Intervals. *R package version 0.2.2*.  
944 <https://CRAN.R-project.org/package=HDInterval> (2020).

945 75. Phipson, B. et al. propeller: testing for differences in cell type proportions in single cell data.  
946 *Bioinformatics* **38**, 4720–4726 (2022).

947 76. Simmons, S. Cell Type Composition Analysis: Comparison of statistical methods. *bioRxiv*  
948 2022.02.04.479123 (2022) doi:10.1101/2022.02.04.479123.

949 77. Büttner, M., Ostner, J., Müller, C. L., Theis, F. J. & Schubert, B. scCODA is a Bayesian model for  
950 compositional single-cell data analysis. *Nat Commun* **12**, 6876 (2021).

951 78. Giorgino, T. Computing and Visualizing Dynamic Time Warping Alignments in R : The dtw Package. *J*  
952 *Stat Softw* **31**, (2009).

953 79. Human Developmental Biology Resource (HDBR). HDBR Atlas. <http://hdbratlas.org>.

954 80. Kerwin, J. et al. The HUDSEN Atlas: a three-dimensional (3D) spatial framework for studying gene  
955 expression in the developing human brain. *J Anat* **217**, 289–299 (2010).

956 81. Gerrelli, D., Lisgo, S., Copp, A. J. & Lindsay, S. Enabling research with human embryonic and fetal  
957 tissue resources. *Development* **142**, 3073–3076 (2015).

958 82. Petukhov, V. et al. Cell segmentation in imaging-based spatial transcriptomics. *Nat Biotechnol* **40**, 345–  
959 354 (2022).

960 83. Biancalani, T. et al. Deep learning and alignment of spatially resolved single-cell transcriptomes with



961 Tangram. *Nat Methods* **18**, 1352–1362 (2021).

962 84. Saka, S. K. et al. Immuno-SABER enables highly multiplexed and amplified protein imaging in tissues.  
963 *Nat. Biotechnol.* **37**, 1080–1090 (2019).

964 85. Kishi, J. Y. et al. SABER amplifies FISH: enhanced multiplexed imaging of RNA and DNA in cells and  
965 tissues. *Nat Methods* **16**, 533–544 (2019).

966 86. Baglama, J., Reichel, L. & Lewis, B. W. irlba: Fast Truncated Singular Value Decomposition and  
967 Principal Components Analysis for Large Dense and Sparse Matrices. *R package version 2.3.3*.  
968 <https://CRAN.R-project.org/package=irlba> (2019).

969 87. Young, M. D. & Behjati, S. SoupX removes ambient RNA contamination from droplet-based single-cell  
970 RNA sequencing data. *Gigascience* **9**, g1aa151 (2020).

971 88. Korsunsky, I. et al. Fast, sensitive and accurate integration of single-cell data with Harmony. *Nat*  
972 *Methods* **16**, 1289–1296 (2019).

973 89. Kumar, L. & Futschik, M. E. Mfuzz: A software package for soft clustering of microarray data.  
974 *Bioinformatics* **2**, 5–7 (2007).

975 90. Brunson, J. C. & Read, Q. D. ggalluvial: Alluvial Plots in “ggplot2”. *R package version 0.12.3*.  
976 <http://corybrunson.github.io/ggalluvial/> (2020).

977 91. Manno, G. L. et al. RNA velocity of single cells. *Nature* **560**, 494–498 (2018).

978 92. Kuo, A., Hansen, K. D. & Hicks, S. C. Quantification and statistical modeling of Chromium-based  
979 single-nucleus RNA-sequencing data. *bioRxiv* 2022.05.20.492835 (2022) doi:10.1101/2022.05.20.492835.

980 93. Yanai, I. et al. Genome-wide midrange transcription profiles reveal expression level relationships in  
981 human tissue specification. *Bioinformatics* **21**, 650–659 (2005).

982 94. Liao, Y., Wang, J., Jaehnig, E. J., Shi, Z. & Zhang, B. WebGestalt 2019: gene set analysis toolkit with  
983 revamped UIs and APIs. *Nucleic Acids Res* **47**, W199–W205 (2019).

984 95. Sande, B. V. de et al. A scalable SCENIC workflow for single-cell gene regulatory network analysis. *Nat*  
985 *Protoc* **15**, 2247–2276 (2020).

986 96. Wickham, H. et al. Welcome to the Tidyverse. *J Open Source Softw* **4**, 1686 (2019).

987 97. Amezquita, R. A. et al. Orchestrating single-cell analysis with Bioconductor. *Nat Methods* **17**, 137–145  
988 (2020).

989 98. Liu, J. et al. Jointly defining cell types from multiple single-cell datasets using LIGER. *Nat Protoc* **15**,  
990 3632–3662 (2020).

991 99. Kolde, R. pheatmap: Pretty Heatmaps. <https://rdr.io/cran/pheatmap/>.

992 100. Wickham, H. ggplot2, Elegant Graphics for Data Analysis. (2009) doi:10.1007/978-0-387-98141-3.

993 101. Wolf, F. A., Angerer, P. & Theis, F. J. SCANPY: large-scale single-cell gene expression data analysis.  
994 *Genome Biol* **19**, 15 (2018).

995 102. Putri, G., Anders, S., Pyl, P., Pimanda, J. & Zanini, F. Analysing high-throughput sequencing data with  
996 HTSeq 2.0. <https://htseq.readthedocs.io/en/master/> (2021).

997 103. Ábrahám, H., Tornóczky, T., Kosztolányi, G. & Seress, L. Cell formation in the cortical layers of the  
998 developing human cerebellum. *Int J Dev Neurosci* **19**, 53–62 (2001).

999 104. Yeung, J. et al. Wls Provides a New Compartmental View of the Rhombic Lip in Mouse Cerebellar  
1000 Development. *J Neurosci* **34**, 12527–12537 (2014).
